# Supplementary material for: Effective protein inhibition in intact mouse oocytes through peptide nanoparticle-mediated antibody transfection
Source: PeerJ. 2016 Apr 14;4:e1849. doi: 10.7717/peerj.1849 (PMC4841238; doi:10.7717/peerj.1849)
Supplement: Supplemental Information 1 — This file includes three sheets: “Original data” sheet has rhodamine fluorescence intensity measurements for all examined oocytes. Net rhodamine fluorescence intensity is equal to cytoplasmic intensity subtracted by background intensity (outside the oocyte); “Statistics” sheet has all the data for statistics and the P value from T test. “Graph” sheet has AVEs and SEMs for the graph corresponding to Fig. 1B. [file peerj-04-1849-s001.xlsx]

## Sheet: Original data
	Figure 1B: Comparison of net rhodamine fluorescence intensity
	Note: Each line of data is from different oocytes
	Treatment	Cytoplamic	Background	Net (cytoplasmic-background)
	Control	7.533	7.095	0.438
		7.391	6.982	0.409
		7.582	7.025	0.557
		7.366	7.069	0.297
		7.381	6.918	0.463
		7.645	7.199	0.446
		7.357	6.822	0.535
	AVE			0.449286
	STD			0.0857219
	SEM			0.0323998
	Rhodamine-IgG	12.2	5.186	7.014
		12.294	5.411	6.883
		11.62	4.858	6.762
		12.243	5.405	6.838
		11.816	5.196	6.62
		10.9	4.491	6.409
		13.976	6.623	7.353
	AVE			6.83986
	STD			0.298759
	SEM			0.11292
	Rhodamine-IgG+chariot	30.627	11.364	19.263
		33.402	14.519	18.883
		30.931	11.142	19.789
		29.309	12.032	17.277
		28.754	11.02	17.734
		34.282	17.118	17.164
		37.189	14.76	22.429
	AVE			18.9341
	STD			1.8428
	SEM			0.696512

## Sheet: Statistics
	Figure 1B: Comparison of net rhodamine fluorescence intensity
		Control	Rhodamine-IgG+chariot		Rhodamine-IgG	Rhodamine-IgG+chariot
		0.438	19.263		7.014	19.263
		0.409	18.883		6.883	18.883
		0.557	19.789		6.762	19.789
		0.297	17.277		6.838	17.277
		0.463	17.734		6.62	17.734
		0.446	17.164		6.409	17.164
		0.535	22.429		7.353	22.429
		P value	5.08647e-12		P value	8.38115e-10

## Sheet: Graph
	Figure 1B: Comparison of net rhodamine fluorescence intensity
		Control	Rhodamine-IgG	Rhodamine-IgG+chariot
	AVE	0.449286	6.83986	18.9341
	SEM	0.0323998	0.11292	0.696512
	AVE	0.449286	6.83986	18.9341
