# Supplementary material for: Effective protein inhibition in intact mouse oocytes through peptide nanoparticle-mediated antibody transfection
Source: PeerJ. 2016 Apr 14;4:e1849. doi: 10.7717/peerj.1849 (PMC4841238; doi:10.7717/peerj.1849)
Supplement: Supplemental Information 3 — This file includes three sheets: “Original data” sheet has Arf5 fluorescence intensity (green) measurements for all examined oocytes. Net Arf5 fluorescence intensity is equal to Arf5 fluorescence intensity within spindle subtracted by background intensity (cytoplasmic region beside spindle); “Statistics” sheet has all the data for statistics and the P value from T test. “Graph” sheet has AVEs and SEMs for the graph corresponding to Fig. 2E. [file peerj-04-1849-s003.xlsx]

## Sheet: Original data
Figure 2E: Arf5 fluorescence intensity within spindle
Note: Each line of data is from different oocytes
	Treatment	Spindle	Background	Net (cytoplasmic-background)
	Control IgG	211.099	9.364	201.735
		219.113	6.787	212.326
		213.613	10.053	203.56
		189.533	10.077	179.456
		161.839	7.249	154.59
		200.661	9.972	190.689
		177.218	10.523	166.695
		142.569	8.88	133.689
		224.688	10.898	213.79
		227.338	6.371	220.967
	AVE			187.75
	STD			28.6238
	SEM			9.05163
	Arl2 IgG	221.047	7.796	213.251
		203.396	6.1	197.296
		158.265	8.513	149.752
		152.782	7.886	144.896
		184.795	9.279	175.516
		211.827	9.113	202.714
		152.328	8.898	143.43
		177.282	8.223	169.059
		179.813	8.835	170.978
		164.456	7.703	156.753
	AVE			172.364
	STD			24.9086
	SEM			7.87678

## Sheet: Statistics
Figure 2E: Comparison of Arf5 fluorescence intensity within spindle
		Control IgG	Arl2 IgG
		201.735	213.251
		212.326	197.296
		203.56	149.752
		179.456	144.896
		154.59	175.516
		190.689	202.714
		166.695	143.43
		133.689	169.059
		213.79	170.978
		220.967	156.753
	P value	0.216038

## Sheet: Gragh
Figure 2E: Comparison of Arf5 fluorescence intensity within spindle
		Control IgG	Arl2 IgG
	Arf5	187.75	172.364
	SEM	9.05163	7.87678
