# Supplementary material for: Effective protein inhibition in intact mouse oocytes through peptide nanoparticle-mediated antibody transfection
Source: PeerJ. 2016 Apr 14;4:e1849. doi: 10.7717/peerj.1849 (PMC4841238; doi:10.7717/peerj.1849)
Supplement: Supplemental Information 4 — This file includes three sheets: “Original data” sheet has numbers and percentages of oocytes at each stage (GV, GV-like, Pre-MI, MI, AI and TI) at 8 h of IVM from three repeats; “Statistics” sheet has all the GV-like or MI percentages for statistics and the P value from T test; “Graph” sheet has the AVEs and SEMs for the graph corresponding to Fig. 3B. [file peerj-04-1849-s004.xlsx]

## Sheet: Original data
	Figure 3B: Number and percentage of oocytes at each stage at 8 hour of IVM (in-vitro maturation)
	Repeat 1	GV	GV-like	Pre-MI	MI	AI	TI	Total
	Control-number	5	0	22	22	3	1	53
	Control-percentage	0.0943396	0	0.415094	0.415094	0.0566038	0.0188679
	Arl2-number	6	28	16	2	0	0	52
	Arl2-percentage	0.115385	0.538462	0.307692	0.0384615	0	0
	Repeat 2	GV	GV-like	Pre-MI	MI	AI	TI	Total
	Control-number	4	0	17	32	3	0	56
	Control-percentage	0.0714286	0	0.303571	0.571429	0.0535714	0
	Arl2-number	5	24	24	3	0	0	56
	Arl2-percentage	0.0892857	0.428571	0.428571	0.0535714	0	0
	Repeat 3	GV	GV-like	Pre-MI	MI	AI	TI	Total
	Control-number	2	1	13	12	3	4	35
	Control-percentage	0.0571429	0.0285714	0.371429	0.342857	0.0857143	0.114286
	Arl2-number	4	21	14	0	0	0	39
	Arl2-percentage	0.102564	0.538462	0.358974	0	0	0
	Figure 3B: Percentage of oocytes-three repeats together
		GV	GV-like	Pre-MI	MI	AI	TI
	Control	0.0943396	0	0.415094	0.415094	0.0566038	0.0188679
		0.0714286	0	0.303571	0.571429	0.0535714	0
		0.0892857	0.0285714	0.371429	0.342857	0.0857143	0.114286
	Ave	0.085018	0.00952381	0.363365	0.443127	0.0652965	0.0443845
	STD	0.012037	0.0164957	0.0561971	0.116836	0.0177472	0.0612669
	SEM	0.00694956	0.00952381	0.0324454	0.0674551	0.0102464	0.0353724
		GV	GV-like	Pre-MI	MI	AI	TI
	Arl2	0.115385	0.538462	0.307692	0.0384615	0	0
		0.0892857	0.428571	0.428571	0.0535714	0	0
		0.102564	0.538462	0.358974	0	0	0
	Ave	0.102411	0.501832	0.365079	0.0306777	0	0
	STD	0.0130501	0.0634451	0.0606704	0.0276209	0	0
	SEM	0.00753449	0.03663	0.0350281	0.015947	0	0

## Sheet: Statistics
	Figure 3B: Comparison of percentage of GV-like & MI oocytes at 8 hour of IVM (in-vitro maturation)
	Stage				Stage
	GV-like	Control	Arl2		MI	Control	Arl2
		0	0.538462			0.415094	0.0384615
		0	0.428571			0.571429	0.0535714
		0.0285714	0.538462			0.342857	0
	P value	0.000201581			P value	0.00400239

## Sheet: Graph
		Figure 3B: Comparison of percentage of GV-like & MI oocytes at 8 hour of IVM (in-vitro maturation)
		Ave	GV	GV-like	Pre-MI	MI	AI	TI
		Control	0.085018	0.00952381	0.363365	0.443127	0.0652965	0.0443845
		Arl2	0.102411	0.501832	0.365079	0.0306777	0	0
		SEM	GV	GV-like	Pre-MI	MI	AI	TI
		Control	0.00694956	0.00952381	0.0324454	0.0674551	0.0102464	0.0353724
		Arl2	0.00753449	0.03663	0.0350281	0.015947	0	0
