# Supplementary material for: Effective protein inhibition in intact mouse oocytes through peptide nanoparticle-mediated antibody transfection
Source: PeerJ. 2016 Apr 14;4:e1849. doi: 10.7717/peerj.1849 (PMC4841238; doi:10.7717/peerj.1849)
Supplement: Supplemental Information 5 — This file includes three sheets: “Original data” sheet has all the measurements of MI spindle length or width (in pixel) at 8 h of IVM from three repeats; “Statistics” sheet has all the measurements of MI spindle length (in pixel) for statistics and the P value from T test. Statistics for spindle width is not shown since it’s not significant; “Graph” sheet has all the AVEs and SEMs (in pixel or μm) for the graph corresponding to Fig. 3D. [file peerj-04-1849-s005.xlsx]

## Sheet: Original data
	Figure 3D: MI spindle length & width (pixel) of oocytes at 8 hour of IVM (in-vitro maturation)
	Note: Each line of data is from different oocytes
		Length	Width			Length	Width
	Control	92.962	67.417		Arl2	92.892	75.24
		114.004	88.64			77.279	80.677
		115.434	73.11			101.193	78.883
		116.039	73.171			92.655	72.638
		121.004	64			106.174	75
		104.995	76.896			95.341	79.157
		122.332	75.505			77.698	78.369
		124.326	60.465			78.243	79.31
		123.713	56.436			80.006	84.005
		109.636	66.573			77.414	77.231
		94.921	81.025			92.655	67.186
		126.143	60.902			86.579	61.4
		119.202	65.513
		125.3	64.281
		114.039	66.483
	AVE	114.937	69.3611			88.1774	75.758
	STD	10.4247	8.60964			10.0877	6.21831
	SEM	2.69165	2.223			2.91208	1.79507

## Sheet: Statistics
	Figure 3D: Comparison of MI spindle length at 8 hour of IVM (in-vitro maturation)
	Control	Arl2
	92.962	92.892
	114.004	77.279
	115.434	101.193
	116.039	92.655
	121.004	106.174
	104.995	95.341
	122.332	77.698
	124.326	78.243
	123.713	80.006
	109.636	77.414
	94.921	92.655
	126.143	86.579
	119.202
	125.3
	114.039
	P value	4.80212e-07

## Sheet: Graph
		Figure 3D: Comparison of MI spindle length & width at 8 hour of IVM (in-vitro maturation)
		Note: For 60x lens of Andor Revolution Confocal system, 1 pixel=0.107μm
		In pixel	Length	Width
	AVE	Control	114.937	69.3611
		Arl2	88.1774	75.758
	SEM	Lenth	2.69165	2.91208
		Width	2.223	1.79507
		In μm	Length	Width
	AVE	Control	12.2982	7.42164
		Arl2	9.43498	8.10611
	SEM	Lenth	0.288007	0.311593
		Width	0.237861	0.192073
