# Supplementary material for: Effective protein inhibition in intact mouse oocytes through peptide nanoparticle-mediated antibody transfection
Source: PeerJ. 2016 Apr 14;4:e1849. doi: 10.7717/peerj.1849 (PMC4841238; doi:10.7717/peerj.1849)
Supplement: Supplemental Information 6 — This file includes three sheets: “Original data” sheet has all the numbers and percentages of oocytes at each stage (GV, GV-like, Pro-MI, MI, AI, TI, Pre-MII, Normal MII, MII (1PB)) at 16 h of IVM after IgG or antibody transfection from three repeats; “Statistics” sheet has all the Pre-MII or MII percentages for statistics and the P value from T test; “Graph” sheet has all the AVEs and SEMs for the graph corresponding to Fig. 3F. Pre-MII oocytes are oocytes with unaligned chromosomes; normal MII oocytes are oocytes with well-aligned chromosomes; MII (1PB) oocytes are all oocytes with first polar body, number of MII (1PB) oocytes = number of Pre-MII oocytes + number of normal MII oocytes. [file peerj-04-1849-s006.xlsx]

## Sheet: Original datas
	Figure 3F: Comparison of percentage of Pre-MII or MII (1PB) oocytes at 16 hour after transfection
	Repeat 1	GV	GV-like	Pro-MI	MI	AI	TI	Pre-MII	Normal MII	Total		MII (1PB)
	Control-number	1	0	10	7	0	1	12	12	43		24
	Control-percentage	0.0232558	0	0.232558	0.162791	0	0.0232558	0.27907	0.27907			0.5581
	Arl2-number	1	10	1	1	0	9	19	0	41		19
	Arl2-percentage	0.0243902	0.243902	0.0243902	0.0243902	0	0.219512	0.463415	0			0.4634
	Repeat 2	GV	GV-like	Pro-MI	MI	AI	TI	Pre-MII	Normal MII	Total
	Control-number	2	1	8	11	0	0	10	16	48		26
	Control-percentage	0.0416667	0.0208333	0.166667	0.229167	0	0	0.208333	0.333333			0.5417
	Arl2-number	3	19	1	0	0	18	8	0	49		8
	Arl2-percentage	0.0612245	0.387755	0.0204082	0	0	0.367347	0.163265	0			0.1633
	Repeat 3	GV	GV-like	Pro-MI	MI	AI	TI	Pre-MII	Normal MII	Total
	Control-number	5	1	5	14	0	0	11	14	50		25
	Control-percentage	0.1	0.02	0.1	0.28	0	0	0.22	0.28			0.5
	Arl2-number	5	12	1	0	0	19	7	0	44		7
	Arl2-percentage	0.113636	0.272727	0.0227273	0	0	0.431818	0.159091	0			0.1591

## Sheet: Statistics
		Figure 3F: Comparison of percentage of Pre-MII or MII (1PB) oocytes at 16 hour after transfection
	Stage					Stage
	Pre-MII	Control	Arl2			1pb	Control	Arl2
		0.5	1				0.55814	0.463415
		0.384615	1				0.541667	0.163265
		0.44	1				0.5	0.159091
		P value	7.42395e-05				P value	0.0283624

## Sheet: Graph
	Figure 3F: Comparison of percentage of Pre-MII or MII (1PB) oocytes at 16 hour after transfection
	Stage	Control	Arl2			Stage	Control	Arl2
	Pre-MII	0.5	1			MII (1PB)	0.55814	0.463415
		0.384615	1				0.541667	0.163265
		0.44	1				0.5	0.159091
	AVE	0.441538	1			AVE	0.533269	0.261924
	STD	0.0577077	0			STD	0.0299657	0.174509
	SEM	0.0333176	0			SEM	0.0173007	0.100753
